# Supplementary material for: Mechanism of an AZO-coated FTO film in improving the hydrogen plasma durability of transparent conducting oxide thin films for amorphous-silicon based tandem solar cells
Source: Royal Society of Chemistry journal article supplement (doi:10.1039/c2jm15682b), 2012-01-01
Supplement: c2jm15682b.pdf [file c2jm15682b.pdf]

# Supporting Information

## **Mechanism of a AZO-coated FTO Film in Improving the Hydrogen Plasma Durability of Transparent Conducting Oxide Thin Film for Amorphous-Silicon Based Tandem Solar Cells**

N. Chantarat, Shu-Han Hsu, Chin-Ching Lin, Mei-Ching Chiang, and San-Yuan Chen\*

\*Emails: [sanyuanchen@mail.nctu.edu.tw](mailto:sanyuanchen@mail.nctu.edu.tw)

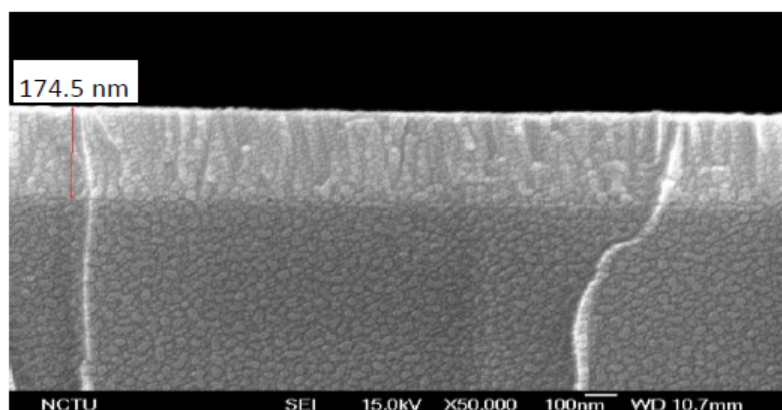

SEM cross-section of AZO

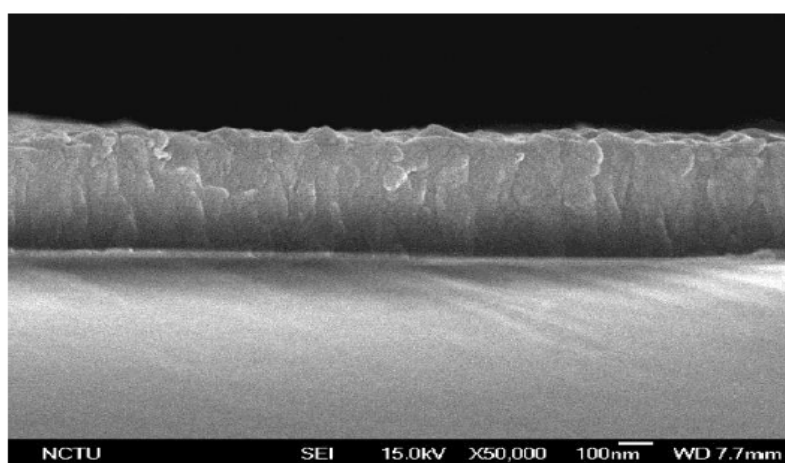

SEM cross-section of FTO

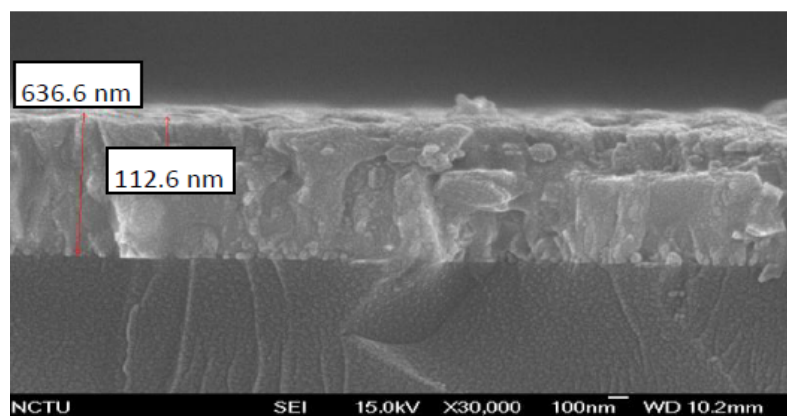

SEM cross-section of Double AZO/FTO

**Figure S1** SEM cross-sectional image of AZO, FTO and Double AZO/FTO films.

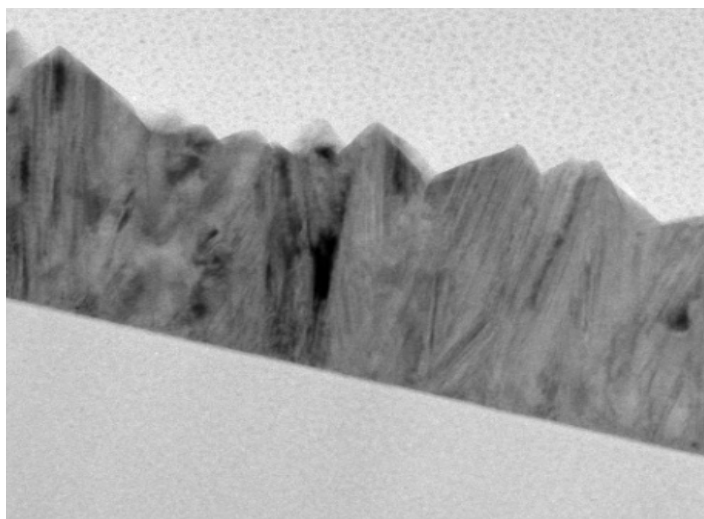

TEM Cross-sectional image of FTO film

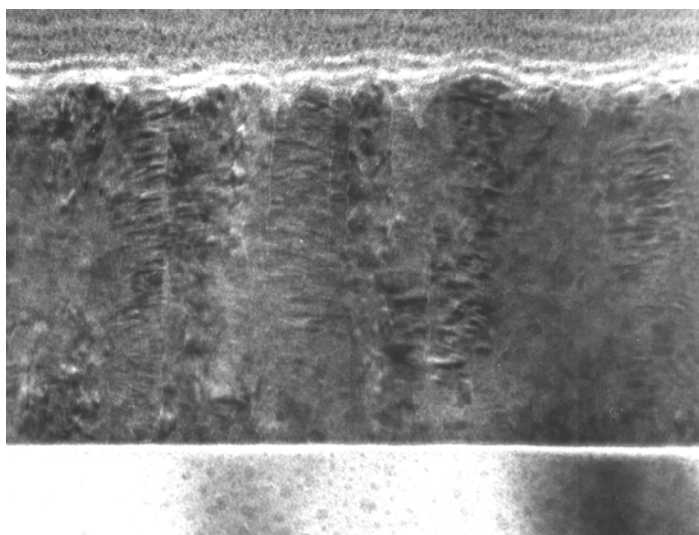

TEM Cross-sectional image of AZO film

**Figure S2** TEM cross-section image of FTO and AZO films.

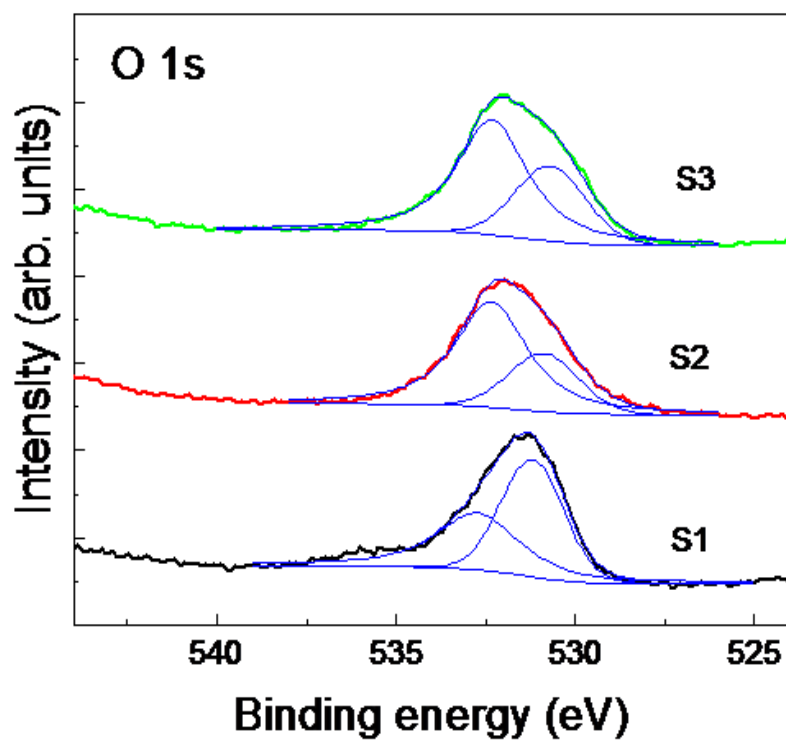

**Figure S3** O1s spectra of FTO film for as-deposited films (S1), H-plasma exposed films (S2), and subsequently annealed films (S3).

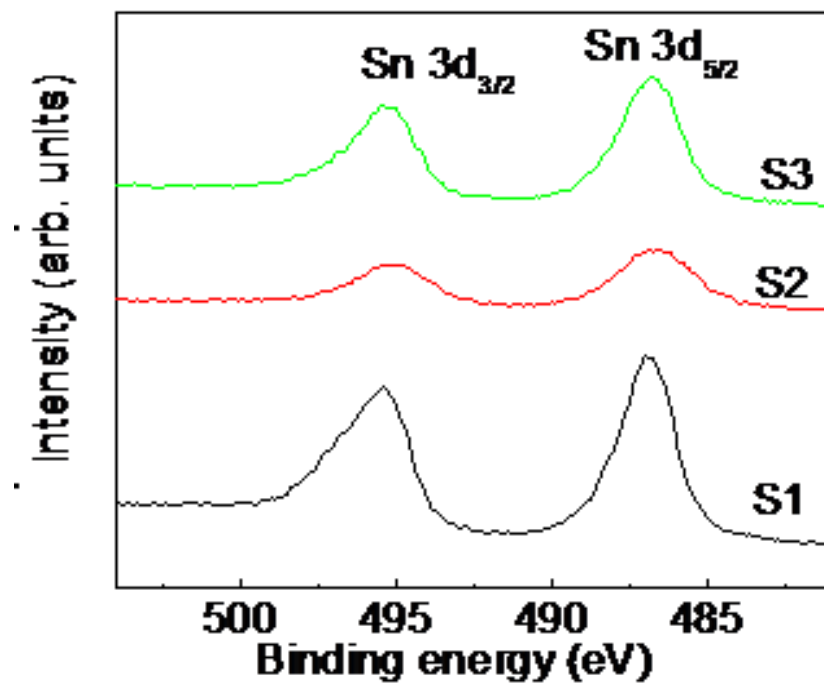

**Figure S4** The relative Sn (3d<sub>3/2</sub>) and Sn (3d<sub>5/2</sub>) core level spectra of the FTO films corresponding to the surface of as-deposited films (S1), the surface of H-plasma exposed films (S2), and the surface of subsequently annealed films (S3).
